# 1 Coordination of robust single cell rhythms in the *Arabidopsis* 2 circadian clock via spatial waves of gene expression

3 Peter D. Gould<sup>1+</sup>, Mirela Domijan<sup>2,3+</sup>, Mark Greenwood<sup>1,2,4</sup>, Isao T. Tokuda<sup>5</sup>, Hannah  
4 Rees<sup>1</sup>, Laszlo Kozma-Bognar<sup>6</sup>, Anthony J.W. Hall<sup>1,7\*</sup>, James C.W. Locke<sup>2,4,8\*</sup>

5 <sup>1</sup>Institute of Integrative Biology, University of Liverpool, Crown Street, Liverpool, L69 7ZB, UK

6 <sup>2</sup>Sainsbury Laboratory, University of Cambridge, Bateman Street, Cambridge, CB2 1LR, UK

7 <sup>3</sup>Department of Mathematical Sciences, University of Liverpool, Peach Street, Liverpool, L69 7ZL

8 <sup>4</sup>Department of Biochemistry, University of Cambridge, 80 Tennis Court Road, Cambridge, CB2

9 1QW, UK

10 <sup>5</sup>Department of Mechanical Engineering, Ritsumeikan University, Noji-higashi, Kusatsu, 525-

11 8577, Japan

12 <sup>6</sup>Biological Research Centre, Hungarian Academy of Sciences, 6726 Szeged, Hungary

13 <sup>7</sup>Earlham Institute, Norwich Research Park, Norwich, NR4 7UH, UK

14 <sup>8</sup>Microsoft Research, 21 Station Road, Cambridge, CB1 2FB, UK

15 \*Email: james.locke@slcu.cam.ac.uk or anthony.hall@earlham.ac.uk

16 +Equal Contribution

17

18 The *Arabidopsis* circadian clock orchestrates gene regulation across the day/night  
19 cycle. Although a multiple feedback loop circuit has been shown to generate the 24h  
20 rhythm, it remains unclear how robust the clock is in individual cells, or how clock  
21 timing is coordinated across the plant. Here we examine clock activity at the single  
22 cell level across *Arabidopsis* seedlings over several days. Our data reveal robust  
23 single cell oscillations, albeit desynchronised. In particular, we observe two waves of  
24 clock activity; one going down, and one up the root. We also find evidence of cell-to-  
25 cell coupling of the clock, especially in the root tip. A simple model shows that cell-  
26 to-cell coupling and our measured period differences between cells can generate the  
27 observed waves. Our results reveal the spatial structure of the plant circadian clock  
28 and suggest that unlike the centralised mammalian clock, the clock has multiple  
29 points of coordination in *Arabidopsis*.

## 30 **Introduction**

31

32 The circadian clock controls gene expression throughout the day and night in most  
33 organisms, from single cell photosynthetic bacteria to mammals (Bell-Pedersen et al.,  
34 2005). In many cases a core circuit that generates this rhythm has been elucidated and  
35 been shown to oscillate in single cells. In multi-cellular organisms these single cell  
36 rhythms must be integrated to allow a coordinated response to the environment.  
37 Mammals achieve this by driving oscillations in peripheral tissues from a central  
38 pacemaker in the brain, the suprachiasmatic nucleus (SCN) (Pando, Morse,  
39 Cermakian, & Sassone-Corsi, 2002; Reppert & Weaver, 2002).

40 The *Arabidopsis* circadian clock generates a 24h rhythm in multiple key processes,  
41 including stomata opening, photosynthesis, and hypocotyl elongation (Hsu & Harmer,  
42 2014). A hierarchical structure for the plant clock has recently been proposed, similar  
43 to that for the mammalian clock, where the shoot clock drives the rhythms in the  
44 leaves and roots (Takahashi, Hirata, Aihara, & Mas, 2015). However, there are further  
45 tissue dependent differences that must be explained. For example, experiments using  
46 a luciferase reporter for clock activity have shown waves of clock gene expression in  
47 leaves (Fukuda, Nakamichi, Hisatsune, Murase, & Mizuno, 2007; Wenden, Toner,  
48 Hodge, Grima, & Millar, 2012), as well as striped expression patterns in roots  
49 (Fukuda, Ukai, & Oyama, 2012).

50 Beyond the coordination of plant rhythms, how robust the circadian clock is in  
51 individual cells across the plant is also unclear. Through integration of data from  
52 whole plant studies, a genetic circuit consisting of multiple coupled feedback loops  
53 has been proposed to generate the 24h rhythm (Fogelmark & Troein, 2014; Pokhilko  
54 et al., 2012). Simulations of this network display stable oscillations (Figure 1a),

55 although experimental measurements of clock rhythms under constant conditions  
56 often display damped rhythms (Figure 1b) (Gould et al., 2013; Locke et al., 2005,  
57 2006; Salomé & McClung, 2005). This damping could be due to the clock circuit in  
58 individual cells losing rhythmicity (top, Figure 1c), or to cells desynchronising due to  
59 different intrinsic periods or phases (Guerriero et al., 2012; Komin, Murza,  
60 Hernández-García, & Toral, 2010) (bottom, Figure 1c), or cells desynchronising due  
61 to stochasticity in clock activity (Guerriero et al., 2012). Previous studies have  
62 attempted to measure the clock in plants at single-cell resolution; however, these have  
63 been confounded by poor temporal/spatial resolution and short time series (Takahashi  
64 et al., 2015; Yakir et al., 2011).

65 Here, we examine the dynamics of the *Arabidopsis* clock across the whole plant at the  
66 single cell level over several days. Our results reveal that damping of rhythms is  
67 mainly due to desynchronisation of oscillating single cells with different periods, and  
68 not due to noise in gene expression or lack of robustness. We observe two waves of  
69 clock gene expression, one up and one down the root, which cause the most  
70 desynchronisation. From our single cell data, we are able to estimate the coupling  
71 strength between cells, and find evidence of coupling, especially strong in the root tip.  
72 A simple model suggests that our observed period differences, plus cell-to-cell  
73 coupling, can generate the observed waves in clock gene expression. Thus, our data  
74 has revealed both the structure and robustness of the plant circadian clock system.

75

## 76 **Results**

77 To analyse the dynamics of the plant clock at the single cell level, we constructed  
78 reporter lines that allowed us to quantitatively measure the nuclear level of the core

79 clock protein CIRCADIAN CLOCK ASSOCIATED 1 (CCA1) (Wang & Tobin,  
80 1998). These reporter lines contained a CCA1-YFP protein fusion construct driven by  
81 the *CCA1* promoter in a *cca1-11* mutant background. They also contained a  
82 35S::H2B-RFP nuclear marker to enable automatic detection of individual nuclei  
83 (Federici, Dupuy, Laplaze, Heisler, & Haseloff, 2012). By screening the clock  
84 phenotypes of multiple reporter lines we ensured that our reporter construct was  
85 functional and rescued the period phenotype of the *cca1-11* mutant (Figure 1-figure  
86 supplement 1). We took forward both a rescued wild-type period (WT) and a long  
87 period (CCA1-long) reporter line for further analysis.

88

89 We carried out time-lapse movies of *Arabidopsis* seedlings using a custom developed  
90 time-lapse confocal microscope setup (Figure 1-figure supplement 2). In order to  
91 examine the intrinsic behavior of the clock we first entrained the seedlings to 12:12h  
92 light/dark cycles before examining the clock under constant conditions (constant blue  
93 light ( $30 \mu\text{mol m}^{-2} \text{s}^{-1}$ ) and temperature (22 °C)), as standard in circadian research.  
94 Our method allowed us to track and extract fluorescence values from the same  
95 individual nuclei over several days (Figure 1d, e). We first examined the average  
96 CCA1-YFP nuclear fluorescence signal from regions of the hypocotyl, cotyledon and  
97 roots (Figure 1f, g). We observed a robust oscillation in the cotyledon (red line,  
98 Figure 1g) and hypocotyl (blue line, Figure 1g), although with slight damping to the  
99 amplitude. In the top part of the root we observed strong damping of the circadian  
100 rhythm (black line, Figure 1g), although surprisingly the oscillations recovered  
101 somewhat in the root tip (grey line, Figure 1g). Three repeat plants showed similar  
102 behavior (Figure 1-figure supplement 3). We also observed similar behavior in our

103 CCA1-long reporter line (Figure 1-figure supplement 4), showing that our results  
104 remain true across a range of clock activity.  
105  
106 To determine what the underlying cause of the damping in different tissues was we  
107 examined the clock rhythm in thousands of individual cells (Figure 1h, Figure 1-  
108 figure supplement 3b, 4b, 5). Oscillations could be observed in all tissues, with most  
109 cells displaying circadian oscillations (Figure 1, Figure 1-source data 1, 2). It is clear  
110 from the traces that the strong damping in the mean levels in the root is not caused by  
111 individual oscillators losing rhythmicity (Figure 1h). We then examined the  
112 synchronicity and robustness of these rhythms in more detail. The hypocotyl and  
113 cotyledon were the most synchronised, with the amplitude of the mean trace nearly  
114 equaling the median amplitude of the individual cell lineages (Figure 2a, Figure 2-  
115 figure supplement 1, 2). The hypocotyl and cotyledon rhythms also exhibited low  
116 period variability both within and between cell lineages, indicating a high level of  
117 robustness (Figure 2b, Figure 2-figure supplement 1b, 2b). However, the root  
118 displayed significant desynchronisation, with the amplitude of the mean trace lower  
119 than the median amplitude of the individual cell lineages (Figure 2a, Figure 2-figure  
120 supplement 1a, 2a), with higher variability in period within and between single cell  
121 lineages (Figure 2b and Figure 2-figure supplement 1b, 2b).  
122  
123 We next asked whether the damping of amplitude in the mean rhythm is caused by  
124 noise in gene expression, as proposed by previous stochastic modelling (Guerriero et  
125 al., 2012). Simulations of the stochastic model of the *Arabidopsis* gene network  
126 (Guerriero et al., 2012) display greater desynchronisation as the system size,  
127 effectively the simulated number of molecules in the cell, is reduced (Figure 2c-e).

128 The lower the molecule number, the more desynchronisation at the single cell level,  
129 and the more damping of the mean expression (red line, Figure 2c). To explore this  
130 further, we simulated the model for a range of system sizes (Figure 2c) and examined  
131 the synchronicity and robustness of the simulations (Figure 2d, e). Previously the  
132 system size was estimated to be of order 100 molecules per cell (bottom panel, Figure  
133 2c) in order for the desynchronisation observed in whole plant measurements to be  
134 explained solely by noise (Guerriero et al., 2012). We compared the level of  
135 desynchronisation and noise from simulations of this model to our experimentally  
136 measured single cell rhythms. The single cell rhythms that we detect in the hypocotyl  
137 and cotyledon are more robust than a system size of 100, and in fact behave closer to  
138 a system size of 1000 (top panel, Figure 2c). The level of desynchronisation observed  
139 in the root and root tip, however, behave more like a simulated system size of 100  
140 (Figure 2b, c). Similar CCA1-YFP expression levels are observed across the plant  
141 (Figure 2f, g), so it is unlikely that this lack of robustness is due solely to a change of  
142 total molecule number for the clock system in different parts of the plant. In fact the  
143 amplitude and expression levels of the single cell oscillations in the root tip are high  
144 compared to other sections across the plant (Figure 2f, g and Figure 2-figure  
145 supplement 1a, c-d, 2a, c-d).

146

147 If the damping in the root is not due to noise in gene expression, or individual cells  
148 losing rhythmicity, what does cause it? The measured variable and desynchronous  
149 rhythms in the root suggest that the clock could be behaving differently in different  
150 parts of the root. To test this possibility we plotted the period of the individual cell  
151 oscillations across the plant (Figure 3a, b and Figure 2-figure supplement 1e, f and 2e,  
152 f). We observed surprising spatial structure to the clock in the root. The upper

153 sections of the root displayed longer periods than the rest of the plant, as reported  
154 previously for the whole root (James et al., 2008). However, we observed very fast  
155 rhythms in the root tip (Figure 3a, b), which is also the section with very high  
156 expression rhythms (Figure 2f, g). Although we do not observe evidence of phase  
157 resetting in the root tip, as proposed in an earlier luciferase study (Fukuda et al.,  
158 2012), this could be due to our different growth conditions and stage of plant  
159 development. A repeat plant showed similar results (Figure 2-figure supplement 1c-f),  
160 as did the CCA1-long reporter line (Figure 2-figure supplement 2c-f). Each section of  
161 the plant can be made up of multiple cell types. So, we next tested whether the  
162 rhythms have any spatial structure in the  $z$  direction, which would suggest that  
163 different cell types have different period rhythms. Plots of period in the  $z$  direction in  
164 each section do not reveal any discernable pattern, including in the root, where cells  
165 are organised radially (Figure 3c, d). This suggests that the differences in rhythms we  
166 observe are not restricted to a specific cell type.

167

168 To further understand the spatial structure of the clock, we examined montages of  
169 clock gene expression (Figure 3e; Figure 2-figure supplement 1g; Videos 1-3) and  
170 timing of peaks of expression (Figure 3f-h) across the plant. The clock peaks earlier in  
171 the hypocotyl than in the cotyledon (Figure 3f-h), and the phase of the rhythm is also  
172 tightest in the hypocotyl, where the phase varies by a standard deviation of 1.47h in  
173 the first peak and 3.09h in last peak (Figure 3g), with more desynchronisation in the  
174 cotyledon (Figure 3f). From the top of the root the phase of the clock is shifted to later  
175 in the day as you go down the root (Figure 3h). However, from the root tip the phase  
176 of the clock is shifted to later in the day as you go up. This generates two waves in the  
177 montages of clock gene expression, one going up and one going down the root

178 (Figure 3e; Video 1; Figure 2-figure supplement 1g, 2g). Thus, the damped mean  
179 rhythm of clock activity we observed in the root (Figure 1g) is caused by the  
180 averaging of these two waves of gene expression. We observed qualitatively similar  
181 waves in two clock luciferase reporter lines, PSEUDO-RESPONSE REGULATOR  
182 9:LUC (Salomé & McClung, 2005) (Figure 3i; Video 4) and CCA1:LUC (Figure 3-  
183 figure supplement 1), showing that our results are a general property of the clock.  
184  
185 The coherent waves of gene expression suggested that the plant clock signal could be  
186 coupled. To estimate this coupling, we calculated the order parameter (Kuramoto,  
187 1984) from our single cell data and estimated the coupling strength based on a  
188 technique developed for mammalian circadian cells (Rougemont & Naef, 2007). We  
189 observed signs of coupling across the plant, with the strongest evidence for coupling  
190 in the root tip, where the order parameter actually increased with time (Figure 3j and  
191 Figure 2-figure supplement 2-4). Interestingly this occurred where cell density was  
192 highest, as observed in cultured SCN cells (Aton, Colwell, Harmar, Waschek, &  
193 Herzog, 2005). To investigate the mechanism for the waves of clock gene expression  
194 in the root we developed a simple mathematical model where the cells are described  
195 by coupled phase oscillators with different periods, as informed by the data (Figure  
196 3k). The periods of the clock in the model were faster in the shoot and root tip than  
197 the rest of the root, as measured experimentally. This simple model can generate  
198 waves of gene expression up and down the root that produce a bow wave in the space-  
199 time plot (Figure 3k), similar to that observed experimentally (Figure 3h, i).  
200  
201  
202



## 203 **Discussion**

204

205 Our single cell measurements have revealed tissue specific differences in the phases  
206 and robustness of the clock in *Arabidopsis*. These differences are not restricted to one  
207 cell type, as similar periods are observed in the *z* dimension through the plant (Figure  
208 3c, d), suggesting that cells are instead responding to information based on their  
209 longitudinal position. The observed robust rhythms in the hypocotyl that peak before  
210 the cotyledon and roots are in line with a proposed hierarchical structure for the plant  
211 clock, where the shoot clock drives the rhythms in the leaves and roots (Takahashi et  
212 al., 2015). However, our results suggest that the structure of the plant clock is more  
213 complicated, as this hierarchical model does not explain the observed short period  
214 oscillations in the root tip. Our results support a more decentralised model of clock  
215 coordination in plants (Endo, 2016; Endo, Shimizu, Nohales, Araki, & Kay, 2014).

216

217 Earlier studies of the clock argue either that the clock is uncoupled (Thain, Hall, &  
218 Millar, 2000; Yakir et al., 2011), or weakly, but detectably, coupled (Fukuda et al.,  
219 2007, 2012; James et al., 2008; Takahashi et al., 2015; Wenden et al., 2012). Our  
220 single cell approach is consistent with weak coupling across the whole plant but  
221 reveals regions with strong local coupling between cells, especially in the root tip,  
222 which is sufficient to drive an increase in synchrony with time. Our modelling shows  
223 that this coupling together with the observed period differences is sufficient to  
224 replicate the decentralised spatial structure of the clock that we observe  
225 experimentally.

226

227 Decentralised coordination could create flexibility and allow parts of the plant to

228 respond differentially to environmental perturbations. There is already evidence that  
229 the root clock may respond differently to light (Bordage, Sullivan, Laird, Millar, &  
230 Nimmo, 2016), and that the vasculature and epidermal clock regulate distinct  
231 physiological processes (Shimizu et al., 2015). It has been recently shown that  
232 initiation of lateral roots triggers the resetting of the clock in the emerging lateral root  
233 (Voß et al., 2015). In the case of lateral roots auxin is proposed to be involved in  
234 resetting the clock (Voß et al., 2015). An important next step will be to investigate  
235 what the coupling signal is for the plant circadian clock (Covington & Harmer, 2007;  
236 Dalchau et al., 2011; Haydon, Mielczarek, Robertson, Hubbard, & Webb, 2013).

237

## 238 **References**

- 239 Aton, S. J., Colwell, C. S., Harmor, A. J., Waschek, J., & Herzog, E. D. (2005).  
240 Vasoactive intestinal polypeptide mediates circadian rhythmicity and synchrony  
241 in mammalian clock neurons. *Nature Neuroscience*, *8*(4), 476.  
242 <https://doi.org/10.1038/nn1419>
- 243 Bell-Pedersen, D., Cassone, V. M., Earnest, D. J., Golden, S. S., Hardin, P. E.,  
244 Thomas, T. L., & Zoran, M. J. (2005). Circadian rhythms from multiple  
245 oscillators: lessons from diverse organisms. *Nature Reviews Genetics*, *6*(7), 544–  
246 556. <https://doi.org/10.1038/nrg1633>
- 247 Bordage, S., Sullivan, S., Laird, J., Millar, A. J., & Nimmo, H. G. (2016). Organ  
248 specificity in the plant circadian system is explained by different light inputs to  
249 the shoot and root clocks. *The New Phytologist*, *212*(1), 136–49.  
250 <https://doi.org/10.1111/nph.14024>
- 251 Costa, M. J., Finkenstädt, B., Roche, V., Lévi, F., Gould, P. D., Foreman, J., ... Rand,  
252 D. A. (2013). Inference on periodicity of circadian time series. *Biostatistics*,

- 253 14(4), 792–806. <https://doi.org/10.1093/biostatistics/kxt020>
- 254 Covington, M. F., & Harmer, S. L. (2007). The circadian clock regulates auxin  
255 signaling and responses in Arabidopsis. *PLoS Biology*, 5(8), e222.  
256 <https://doi.org/10.1371/journal.pbio.0050222>
- 257 Dalchau, N., Baek, S. J., Briggs, H. M., Robertson, F. C., Dodd, A. N., Gardner, M.  
258 J., ... Webb, A. A. R. (2011). The circadian oscillator gene GIGANTEA  
259 mediates a long-term response of the Arabidopsis thaliana circadian clock to  
260 sucrose. *Proceedings of the National Academy of Sciences of the United States of*  
261 *America*, 108(12), 5104–9. <https://doi.org/10.1073/pnas.1015452108>
- 262 Edwards, K. D., Akman, O. E., Knox, K., Lumsden, P. J., Thomson, A. W., Brown, P.  
263 E., ... Millar, A. J. (2010). Quantitative analysis of regulatory flexibility under  
264 changing environmental conditions. *Molecular Systems Biology*, 6(1), 424.  
265 <https://doi.org/10.1038/msb.2010.81>
- 266 Endo, M. (2016). Tissue-specific circadian clocks in plants. *Current Opinion in Plant*  
267 *Biology*, 29, 44–49. <https://doi.org/10.1016/j.pbi.2015.11.003>
- 268 Endo, M., Shimizu, H., Nohales, M. A., Araki, T., & Kay, S. A. (2014). Tissue-  
269 specific clocks in Arabidopsis show asymmetric coupling. *Nature*, 515, 419–422.
- 270 Federici, F., Dupuy, L., Laplaze, L., Heisler, M., & Haseloff, J. (2012). Integrated  
271 genetic and computation methods for in planta cytometry. *Nature Methods*, 9(5),  
272 483–485. <https://doi.org/10.1038/nmeth.1940>
- 273 Fogelmark, K., & Troein, C. (2014). Rethinking transcriptional activation in the  
274 Arabidopsis circadian clock. *PLoS Computational Biology*, 10(7), e1003705.  
275 <https://doi.org/10.1371/journal.pcbi.1003705>
- 276 Fukuda, H., Nakamichi, N., Hisatsune, M., Murase, H., & Mizuno, T. (2007).  
277 Synchronization of Plant Circadian Oscillators with a Phase Delay Effect of the

- 278 Vein Network. *Physical Review Letters*, 99(9), 98102.  
279 <https://doi.org/10.1103/PhysRevLett.99.098102>
- 280 Fukuda, H., Ukai, K., & Oyama, T. (2012). Self-arrangement of cellular circadian  
281 rhythms through phase-resetting in plant roots. *Physical Review E*, 86(4), 41917.  
282 <https://doi.org/10.1103/PhysRevE.86.041917>
- 283 Gillespie, D. T. (1977). Exact stochastic simulation of coupled chemical reactions.  
284 *The Journal of Physical Chemistry*, 81(25), 2340–2361.  
285 <https://doi.org/10.1021/j100540a008>
- 286 Gould, P. D., Diaz, P., Hogben, C., Kusakina, J., Salem, R., Hartwell, J., & Hall, A.  
287 (2009). Delayed fluorescence as a universal tool for the measurement of  
288 circadian rhythms in higher plants. *The Plant Journal*, 58, 893–901.
- 289 Gould, P. D., Ugarte, N., Domijan, M., Costa, M., Foreman, J., Macgregor, D., ...  
290 Hall, A. J. W. (2013). Network balance via CRY signalling controls the  
291 Arabidopsis circadian clock over ambient temperatures. *Molecular Systems*  
292 *Biology*, 9, 650. <https://doi.org/10.1038/msb.2013.7>
- 293 Guerriero, M. L., Pokhilko, A., Fernández, A. P., Halliday, K. J., Millar, A. J., &  
294 Hillston, J. (2012). Stochastic properties of the plant circadian clock. *Journal of*  
295 *the Royal Society, Interface*, 9(69), 744–756.  
296 <https://doi.org/10.1098/rsif.2011.0378>
- 297 Hall, A., Bastow, R. M., Davis, S. J., Hanano, S., McWatters, H. G., Hibberd, V., ...  
298 Millar, A. J. (2003). The TIME FOR COFFEE gene maintains the amplitude and  
299 timing of Arabidopsis circadian clocks. *The Plant Cell*, 15(11), 2719–29.  
300 <https://doi.org/10.1105/tpc.013730>
- 301 Haydon, M. J., Mielczarek, O., Robertson, F. C., Hubbard, K. E., & Webb, A. A. R.  
302 (2013). Photosynthetic entrainment of the Arabidopsis thaliana circadian clock.

- 303 *Nature*, 502(7473), 689–92. <https://doi.org/10.1038/nature12603>
- 304 Hsu, P. Y., & Harmer, S. L. (2014). Wheels within wheels: the plant circadian system.  
305 *Trends in Plant Science*, 19(4), 240–9.  
306 <https://doi.org/10.1016/j.tplants.2013.11.007>
- 307 James, A. B., Monreal, J. A., Nimmo, G. A., Kelly, C. L., Herzyk, P., Jenkins, G. I.,  
308 & Nimmo, H. G. (2008). The circadian clock in Arabidopsis roots is a simplified  
309 slave version of the clock in shoots. *Science*, 322(5909), 1832–5.  
310 <https://doi.org/10.1126/science.1161403>
- 311 Johnson, M., & Frasier, S. (1985). Nonlinear least squares analysis. *Methods*  
312 *Enzymol.*, 117, 301–342.
- 313 Kellogg, R. A., & Tay, S. (2015). Noise facilitates transcriptional control under  
314 dynamic inputs. *Cell*, 160(3), 381–92. <https://doi.org/10.1016/j.cell.2015.01.013>
- 315 Komin, N., Murza, A. C., Hernández-García, E., & Toral, R. (2010). Synchronization  
316 and entrainment of coupled circadian oscillators. *Interface Focus*, 1(1).
- 317 Kuramoto, Y. (1984). *Chemical Oscillations, Waves, and Turbulence* (Vol. 19).  
318 Berlin, Heidelberg: Springer Berlin Heidelberg. [https://doi.org/10.1007/978-3-](https://doi.org/10.1007/978-3-642-69689-3)  
319 [642-69689-3](https://doi.org/10.1007/978-3-642-69689-3)
- 320 Litthauer, S., Battle, M. W., Lawson, T., & Jones, M. A. (2015). Phototropins  
321 maintain robust circadian oscillation of PSII operating efficiency under blue  
322 light. *The Plant Journal*, 83(6), 1034–1045. <https://doi.org/10.1111/tpj.12947>
- 323 Locke, J. C. W., Kozma-Bognár, L., Gould, P. D., Fehér, B., Kevei, E., Nagy, F., ...  
324 Millar, A. J. (2006). Experimental validation of a predicted feedback loop in the  
325 multi-oscillator clock of Arabidopsis thaliana. *Molecular Systems Biology*, 2, 59.  
326 <https://doi.org/10.1038/msb4100102>
- 327 Locke, J. C. W., Southern, M. M., Kozma-Bognár, L., Hibberd, V., Brown, P. E.,

- 328 Turner, M. S., & Millar, A. J. (2005). Extension of a genetic network model by  
329 iterative experimentation and mathematical analysis. *Molecular Systems Biology*,  
330 *1*, 2005.0013. <https://doi.org/10.1038/msb4100018>
- 331 Moore, A., Zielinski, T., & Millar, A. J. (2014). Online period estimation and  
332 determination of rhythmicity in circadian data, using the BioDare data  
333 infrastructure. *Methods in Molecular Biology*, *1158*, 13–44.  
334 [https://doi.org/10.1007/978-1-4939-0700-7\\_2](https://doi.org/10.1007/978-1-4939-0700-7_2)
- 335 Pando, M. P., Morse, D., Cermakian, N., & Sassone-Corsi, P. (2002). Phenotypic  
336 rescue of a peripheral clock genetic defect via SCN hierarchical dominance. *Cell*,  
337 *110*(1), 107–17.
- 338 Pfeiffer, A., Kunkel, T., Hiltbrunner, A., Neuhaus, G., Wolf, I., Speth, V., ... Schäfer,  
339 E. (2009). A cell-free system for light-dependent nuclear import of phytochrome.  
340 *The Plant Journal*, *57*(4), 680–689. [https://doi.org/10.1111/j.1365-](https://doi.org/10.1111/j.1365-313X.2008.03721.x)  
341 [313X.2008.03721.x](https://doi.org/10.1111/j.1365-313X.2008.03721.x)
- 342 Pokhilko, A., Fernández, A. P., Edwards, K. D., Southern, M. M., Halliday, K. J., &  
343 Millar, A. J. (2012). The clock gene circuit in *Arabidopsis* includes a  
344 repressilator with additional feedback loops. *Molecular Systems Biology*, *8*(1),  
345 574. <https://doi.org/10.1038/msb.2012.6>
- 346 Reppert, S. M., & Weaver, D. R. (2002). Coordination of circadian timing in  
347 mammals. *Nature*, *418*(6901), 935–941. <https://doi.org/10.1038/nature00965>
- 348 Rougemont, J., & Naef, F. (2007). Dynamical signatures of cellular fluctuations and  
349 oscillator stability in peripheral circadian clocks. *Molecular Systems Biology*, *3*,  
350 93. <https://doi.org/10.1038/msb4100130>
- 351 Salomé, P. A., & McClung, C. R. (2005). PSEUDO-RESPONSE REGULATOR 7  
352 and 9 are partially redundant genes essential for the temperature responsiveness

- 353 of the Arabidopsis circadian clock. *The Plant Cell*, 17(3), 791–803.
- 354 <https://doi.org/10.1105/tpc.104.029504>
- 355 Shimizu, H., Katayama, K., Koto, T., Torii, K., Araki, T., & Endo, M. (2015).
- 356 Decentralized circadian clocks process thermal and photoperiodic cues in
- 357 specific tissues. *Nature Plants*, 1(11), 15163.
- 358 <https://doi.org/10.1038/nplants.2015.163>
- 359 Straume, M., Frasier-Cadoret, S. G., & Johnson, M. L. (2002). Least-Squares
- 360 Analysis of Fluorescence Data. In *Topics in Fluorescence Spectroscopy* (pp.
- 361 177–240). Boston: Kluwer Academic Publishers. [https://doi.org/10.1007/0-306-](https://doi.org/10.1007/0-306-47058-6_4)
- 362 [47058-6\\_4](https://doi.org/10.1007/0-306-47058-6_4)
- 363 Takahashi, N., Hirata, Y., Aihara, K., & Mas, P. (2015). A Hierarchical Multi-
- 364 oscillator Network Orchestrates the Arabidopsis Circadian System. *Cell*, 163(1),
- 365 148–159. <https://doi.org/10.1016/j.cell.2015.08.062>
- 366 Thain, S. C., Hall, A., & Millar, A. J. (2000). Functional independence of circadian
- 367 clocks that regulate plant gene expression. *Current Biology*, 10(16), 951–6.
- 368 Voß, U., Wilson, M. H., Kenobi, K., Gould, P. D., Robertson, F. C., Peer, W. A., ...
- 369 Bennett, M. J. (2015). The circadian clock rephases during lateral root organ
- 370 initiation in Arabidopsis thaliana. *Nature Communications*, 6, 7641.
- 371 <https://doi.org/10.1038/ncomms8641>
- 372 Wang, Z. Y., & Tobin, E. M. (1998). Constitutive expression of the CIRCADIAN
- 373 CLOCK ASSOCIATED 1 (CCA1) gene disrupts circadian rhythms and
- 374 suppresses its own expression. *Cell*, 93(7), 1207–17.
- 375 Wenden, B., Toner, D. L. K., Hodge, S. K., Grima, R., & Millar, A. J. (2012).
- 376 Spontaneous spatiotemporal waves of gene expression from biological clocks in
- 377 the leaf. *Proceedings of the National Academy of Sciences of the United States of*

378 *America*, 109(17), 6757–6762. <https://doi.org/10.1073/pnas.1118814109>  
379 Yakir, E., Hassidim, M., Melamed-Book, N., Hilman, D., Kron, I., & Green, R. M.  
380 (2011). Cell autonomous and cell-type specific circadian rhythms in Arabidopsis.  
381 *The Plant Journal*, 68(3), 520–531. [https://doi.org/10.1111/j.1365-](https://doi.org/10.1111/j.1365-313X.2011.04707.x)  
382 313X.2011.04707.x

383

#### 384 **Acknowledgements**

385 We would like to acknowledge the Liverpool Centre for Cell Imaging for assistance  
386 and maintenance of the confocal microscope, specifically Marco Marcello facility  
387 manager and David Mason image analysis support. A.H. and P.D.G. were funded by  
388 BBSRC grant BB/K018078/1, J.C.W.L. and M.D. by BBSRC grant BB/K017152/1  
389 and M.G. by the Liverpool/Durham/Newcastle BBSRC DTP. Correspondence and  
390 requests for materials should be addressed to J.L. ([james.locke@slcu.cam.ac.uk](mailto:james.locke@slcu.cam.ac.uk)) or  
391 A.H. ([anthony.hall@earlham.ac.uk](mailto:anthony.hall@earlham.ac.uk)).

392

#### 393 **Contributions**

394 A.J.W.H. and J.C.W.L. designed the research. P.D.G. developed the time-lapse  
395 microscopy platform and carried out the microscopy and delayed fluorescence  
396 imaging. M.D. carried out the mathematical modelling and statistics. M.G. carried out  
397 the luciferase imaging and analysis. L.K. completed the cloning. P.D.G., H.R., M.D.,  
398 M.G. and I.T. carried out analysis of single cell data. All authors contributed to the  
399 writing of the manuscript.

400

#### 401 **Competing interests**

402 The authors declare no competing financial interests.



403 **Figures**

404

405

406

407

408

409

410

411

412

413

414

415

416

417

418

419 **Figure 1. Quantitative time-lapse microscopy reveals single cell clock dynamics**

420 **across the plant.** **a**, Current models of the clock (Pokhilko et al., 2012) predict

421 undamped oscillations. **b**, CCA1:LUC bulk averaged over multiple seedlings shows

422 damping clock oscillations (mean  $\pm$  s.e.m.;  $n = 32$  seedlings). **c**, The reason for

423 damping could be due to damping rhythms in individual cells (top) or due to

424 desynchronisation between cells (bottom). **d**, Images show a representative nuclei

425 from the cotyledon of a *cca1-11* CCA1::CCA1-YFP; 35S::H2B-RFP seedling that

426 had been grown in LD cycles before being released into continuous light free running

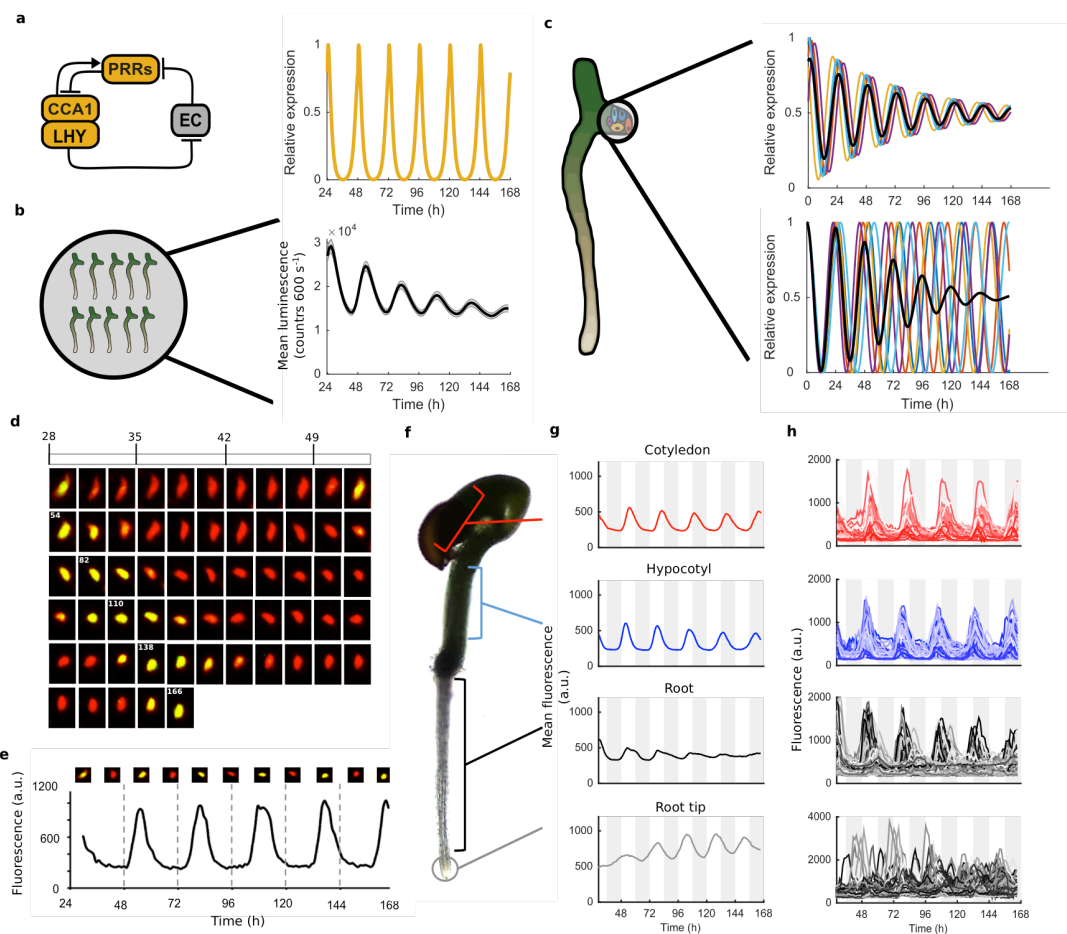

427 conditions for several days. The red channel represents when H2B fluoresce and the  
428 yellow CCA1. Times of peak expression are indicated on images. **e**, Expression levels  
429 of CCA1-YFP from the representative nuclei shown in (**d**). Images of the nuclei are  
430 also shown for the peaks and troughs in the CCA1-YFP oscillation. **f**, Representative  
431 seedling identifying the different sections imaged. **g**, Mean traces of single cell  
432 CCA1-YFP for over 5 days of constant light in different regions of the plant showing  
433 damping rhythms in the root, but not the root tip. **h**, CCA1-YFP traces from  
434 individual cell in each section for the same 5 days.

435

436

437

438

439

440

441

442

443

444

445

446

447

448

449

450

451

452

453

454

455

456

457

458

459

460

461

462

463

464

465

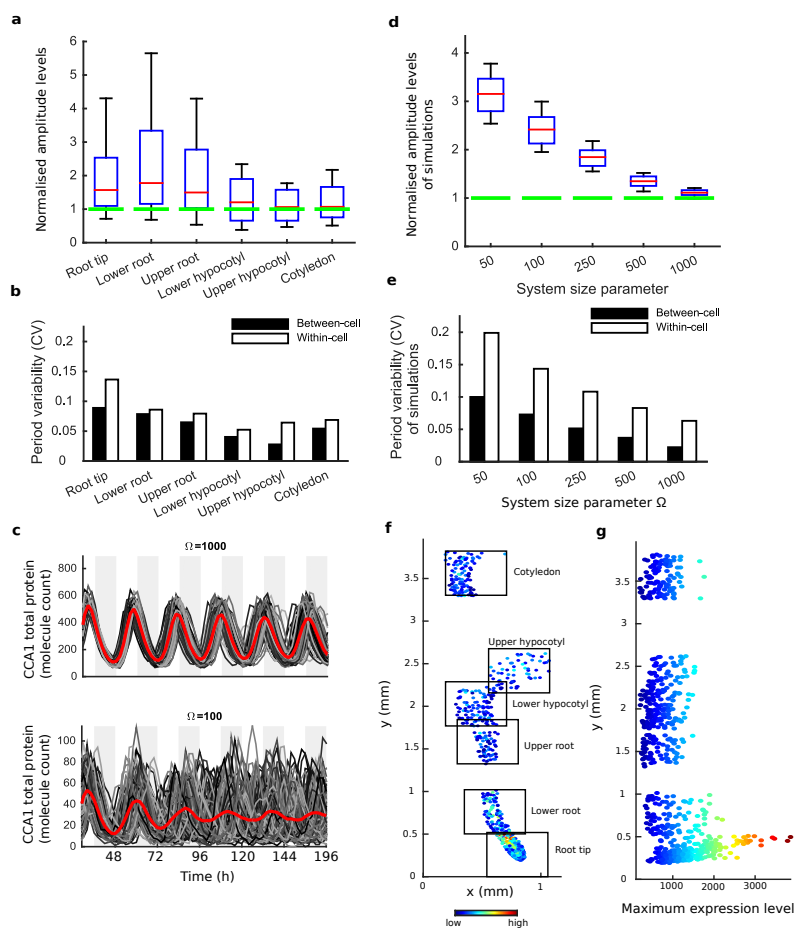

466 **Figure 2. Single cell analysis reveals tissue level differences in robustness of the**

467 **clock. a**, Rhythmic cell amplitudes in the imaged sections normalised to the

468 amplitude of the mean trace (green line). For root tip,  $n = 242$ ; lower root,  $n = 83$ ;

469 upper root,  $n = 46$ ; lower hypocotyl,  $n = 114$ ; upper hypocotyl,  $n = 53$ ; cotyledon,  $n =$

470 103. Whiskers represent 9<sup>th</sup> and 91<sup>st</sup> percentile,  $n$  the number of cells. **b**, Between-cell

471 and within-cell period variability in each imaged section. **c**, Stochastic model CCA1

472 total molecule count for  $\Omega = 1000$  (top) and  $\Omega = 100$  for 100 (bottom) simulated runs

473 (grey) plotted from 29h to 168h in constant light (comparable to the data in Figure 1).

474 Means of all simulated runs are shown in red.  $\Omega$  represents the system size. **d**,

475 Rhythmic simulated run amplitudes for different system sizes ( $\Omega$ ) normalised to the

476 mean simulation (green line). **e**, Between and within cell variability of each

477 simulation with different scaling factor. **f**, Scatterplot of the rhythmic cells in all  
478 imaged plant sections stitched together. Colour indicates the oscillation amplitude. **g**,  
479 Scatterplot of the amplitude values vs. longitudinal position on the plant measured  
480 from the root tip. Colour legend is the same as (**f**).

481

482

483

484

485

486

487

488

489

490

491

492

493

494

495

496

497

498

499

500

501

502

503

504

505

506

507

508

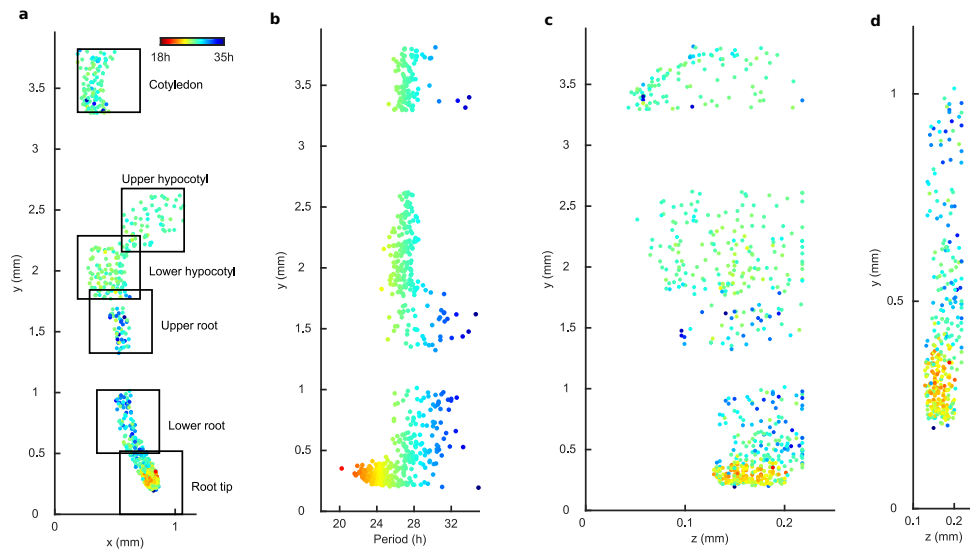

509

510

511

512

513

514

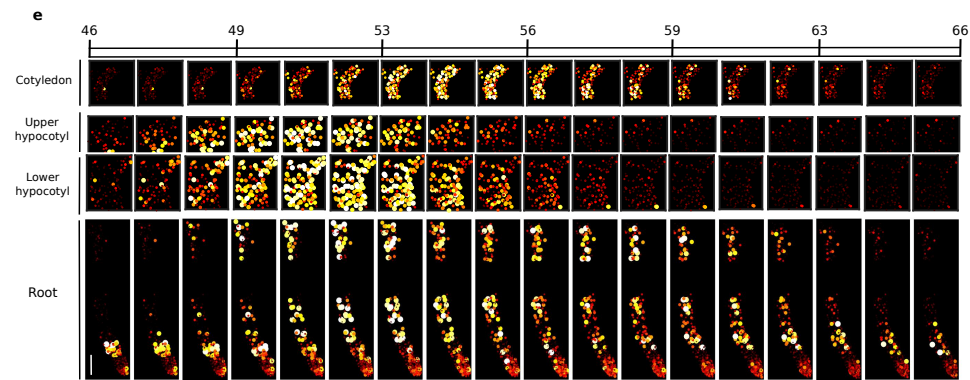

515

516

517

518

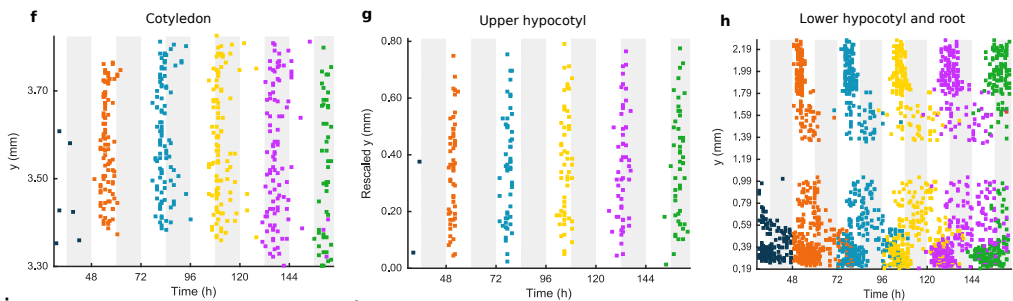

519

520

521

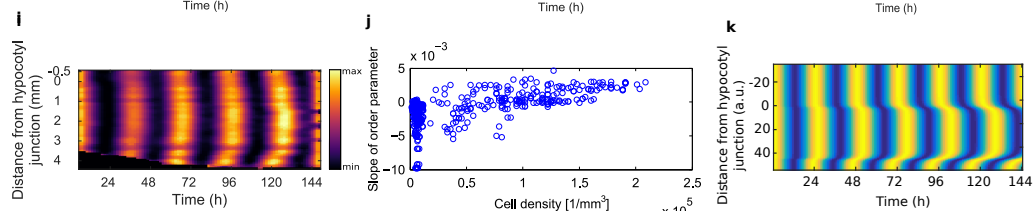

522

523 **Figure 3. Single cell period differences and cell-to-cell coupling generate spatial**

524 **waves of clock gene expression. a**, Scatterplot of the rhythmic cells in all imaged

525 plant sections stitched together in *x-y* direction. Colour indicates the oscillation

526 period. **b**, Period values vs. longitudinal position on the plant measured from the root  
527 tip. Colour legend is the same as **(a)**. **c, d**, Scatterplot in the  $y$ - $z$  direction of rhythmic  
528 cells in all imaged plant sections **(c)** or in the root and root tip sections only **(d)**.  
529 Colour legend is the same as **(a)**. **e**, Montage of the normalised expression of  
530 rhythmic cells from the root (bottom panel, first image taken after 46.1h in LL), lower  
531 hypocotyl (taken after 46.6h in LL), upper hypocotyl (taken after 46.7h) and  
532 cotyledon (top panel, taken after 46.9h in LL). Each frame is approximately 1.1h  
533 apart. Scale bar represents 0.25 mm. **f-h**, Space-time plots of peak times of rhythmic  
534 cells across sections: cotyledon **(f)** upper hypocotyl **(g)**, lower hypocotyl and root (all  
535 sections) **(h)**. **i**, Representative space-time plot of normalised PRR9:LUC expression  
536 across longitudinal sections of a seedling ( $N = 2$ ,  $n = 7$ ).  $N$  represents the number of  
537 independent experiments,  $n$  the total number of individual seedlings. **j**, Slopes of the  
538 order parameter are plotted against cell densities. A positive slope indicates that the  
539 level of synchrony increases in time due to cell-cell interactions. **k**, Space-time plot of  
540 simulated total normalized *CCAI* expression across longitudinal sections of the  
541 seedling.

542

543

544

545

546

547

548

549 **Methods**

550 **Constructs.** The CCA1::CCA1-YFP was constructed as follows: The coding region  
551 of *CCA1* was amplified from *Arabidopsis* (Ws) genomic DNA using the primer pair  
552 CCA1\_CDS\_Fwd (5'-AAAGGATCCATGGAGACAAATTCGTCTGGA-3') and  
553 CCA1\_CDS\_Rev (5'-ATACCCGGGTGTGGAAGCTTGAGTTTCCAA-3'). The  
554 *CCA1* promoter region was amplified from *Arabidopsis* (Ws) genomic DNA using the  
555 primer pair CCA1\_prom\_Fwd (5'-  
556 AAAGAATTCATTTAGTCTTCTACCCTTCATGC-3') and the CCA1\_prom\_Rev  
557 (5'-ATAGGATCCCACTAAGCTCCTCTACACA ACTTC-3'). Unique restriction  
558 sites were designed at the ends of the amplicons to facilitate cloning. The fragment of  
559 *CCA1* coding region was cloned in the modified pPCV812 binary plasmid (Pfeiffer et  
560 al., 2009) between the 35S promoter and the *YFP* gene via *Bam*HI (5') and *Sma*I (3')  
561 sites, resulting in 35S::CCA1-YFP. Next, the 35S promoter was replaced by the *CCA1*  
562 promoter fragment via *Eco*RI (5') and *Bam*HI (3') sites, resulting in CCA1::CCA1-  
563 YFP. The cloned *CCA1* promoter fragment was 862 bp in length and contained the  
564 full 5' -untranslated region, but not the ATG.

565

566 **Plant growth material.** The CCA1::CCA1-YFP construct was transformed in *cca1-*  
567 *11* (Ws) mutant background (Hall et al., 2003). Homozygous T3 generations of  
568 several independent transgenic lines were checked for complementation via delayed  
569 fluorescence (Gould et al., 2009) (Figure 1-figure supplement 1b, c). The  
570 CCA1::CCA1-YFP expressing line showing full complementation was then re-  
571 transformed with 35S::H2B-RFP which was used for tracking purposes during  
572 analysis (Federici et al., 2012). The CCA1:LUC and PRR9:LUC lines used are in the  
573 Col-0 background and were built as part of the ROBuST project.

574

575 *Arabidopsis* seed were surface sterilised and suspended in 0.1% top agar and placed  
576 in 4 °C for 2 days. After sowing, seeds were grown inside of growth incubators  
577 (Sanyo MLR-352) under 12:12 LD cycles in 80  $\mu\text{mol m}^{-2} \text{s}^{-1}$  cool white light at 22 °C  
578 for entrainment. Henceforth, these conditions are referred to as entrainment  
579 conditions.

580

581 **Luciferase and delayed fluorescence bulk imaging.** 10-20 seed were sown onto  
582 Murashige and Skoog (MS) 2% agar in clear 96 well microtitre plates with at least 8  
583 wells per line. A second clear microtitre plate was placed on top of the plate  
584 containing the seed to increase well height. These were then sealed using porous tape  
585 (Micropore). Seedlings were grown for 9 days under entrainment conditions and  
586 transferred to experimental conditions on dawn of the 10<sup>th</sup> day. For luciferase  
587 experiments, on the 9<sup>th</sup> day seedlings were sprayed with a 5 mM luciferin solution in  
588 0.001% Triton x-100 before transfer to experimental conditions on dawn of the 10<sup>th</sup>  
589 day.

590

591 Imaging was carried out in Sanyo temperature controlled cabinets (MIR-553 or MIR-  
592 154) at 22 °C and under an equal mix of red and blue LEDs (40  $\mu\text{mol m}^{-2} \text{sec}^{-1}$  total).  
593 Seedlings were imaged using an ORCA-II-BT (Hamamatsu Photonics, Japan) or  
594 LUMO CCD camera (QImaging, Canada). Experiments were run over several days  
595 with images being taken every hour as described previously (Gould et al., 2013;  
596 Litthauer, Battle, Lawson, & Jones, 2015). Image analysis was carried out using  
597 Imaris (Bitplane, Switzerland) or ImageJ (NIH, USA).

598



599 **Luciferase macro imaging.** Seedlings were sown in a row of eight seedlings on 2%  
600 agar media supplemented with MS media. Seedlings were grown upright for four days  
601 under entrainment conditions. Imaging commenced on dawn of the fifth day. Imaging  
602 was performed inside of Sanyo plant growth incubators at 22 °C under an equal mix  
603 of red and blue light emitting diodes (40  $\mu\text{mol m}^{-2} \text{sec}^{-1}$  total). Seedlings were imaged  
604 upright using a LUMO CCD camera (QImaging, Canada). Experiments were run over  
605 several days with images being taken every 90 minutes.

606

607 **Confocal microscopy.** For confocal experiments seed were sown directly onto glass  
608 bottom dishes (Greiner, Austria) in an array format. Once dry, the seed were covered  
609 with 5 ml MS 2% agar media in absence of sucrose. Once set, dishes were sealed with  
610 porous tape (Micropore) and grown upright under entrainment conditions for 4 days.  
611 After 4 days plates were ready for imaging.

612

613 The microscopy pipeline is outlined in Figure 1-figure supplement 2. Up to 18  
614 seedlings were grown in an array format on glass bottom dishes. At dawn on the 4<sup>th</sup>  
615 day of growth the dishes were fixed into the confocal temperature controlled stage (22  
616 °C) using the dish manifold. To maintain correct light conditions (30  $\mu\text{mol m}^{-2} \text{s}^{-2}$   
617 constant blue light) a custom-made light emitting diode (LED) rig was used. Growth  
618 conditions allowed slow growth during the movie, which enabled easier tracking of  
619 single cells. A Zeiss 710 (Zeiss, Germany) inverted confocal microscope with a  
620 40x/1.2 water corrected oil objective was used for all imaging. YFP and RFP  
621 excitation was produced using a 514 nm laser and a main beamsplitter (MBS)  
622 458/514. To reduce problems with auto-fluorescence and improve signal to noise ratio  
623 a lambda scan was carried using a ChS PMT and filters 492-658. Brightfield (BF)

624 used a ChD PMT. Imaging was carried out using a 0.6 zoom to increase field of view.  
625 A motorised stage was used to allow multiple positions to be imaged across the plant  
626 per experimental run. The diameter of nuclei in our seedlings ranges in size from 6  
627  $\mu\text{m}$  (root tip) to 15  $\mu\text{m}$  (hypocotyl). A resolution of 2  $\mu\text{m}$  in the  $z$  dimension was  
628 chosen to allow the capture of several slices through each nucleus. Data was auto  
629 saved during imaging with data split into files by position imaged.

630

631 **Processing confocal images.** Firstly blank images created by time-lapse being  
632 terminated early were removed in ImageJ. Also with ImageJ, lambda scans produced  
633 during confocal imaging were split into YFP (511 to 547 nm), RFP (586 to 625 nm)  
634 and brightfield (BF) spectrums and then reduced in dimensionality to give one  
635 channel for each wavelength. Data was then saved as OME TIFF, writing each time  
636 point as a separate file. Once processed all the data was loaded into Imaris (Bitplane,  
637 Switzerland) and merged to produce one file containing YFP, RFP and BF. A median  
638 filter size 3x3x1 was then applied across all of the data. Detection of YFP/RFP  
639 expressing cells was carried out using the spot detection feature and tracking of spots  
640 over time was carried out using an autoregressive motion model using an estimated  
641 cell  $x,y$  diameter of 6-10  $\mu\text{m}$ . Data was then exported in excel format for further  
642 analysis. Details are provided in the subsequent section. Quality control checks were  
643 carried out at multiple points (see Figure 1-figure supplement 2). The first quality  
644 check was made to ensure that the seedling remained in the focal plane during the  
645 course of the experiment. If not, the dataset was not carried forward for further  
646 analysis. The second check was to make sure that all processing has occurred  
647 correctly. The third check was carried out to correct any errors in tracking cells across  
648 the time-lapse data. The fourth check used the videos to more closely monitor the data

649 for anything that looked problematic. The final check used the graphs to identify any  
650 problems that may have occurred during the whole single cell pipeline. If the laser  
651 power was not found to be stable during the course of the imaging the dataset was not  
652 carried forward for further analysis.

653

654 **Single cell data processing.** Period analysis was carried out in BioDare, an online  
655 system for data sharing and analysis (Costa et al., 2013; Moore, Zielinski, & Millar,  
656 2014). Since most of the period analysis methods in BioDare require evenly spaced  
657 time series, the data was first interpolated (using MATLAB's (MathWorks, U.K.)  
658 interp1 function and spacing of 1h). Period estimates were obtained by three different  
659 methods: Spectrum Resampling (Costa et al., 2013), FFT-NLLS (Johnson & Frasier,  
660 1985; Straume, Frasier-Cadoret, & Johnson, 2002) and mFourFit (Edwards et al.,  
661 2010). Cells were classed as rhythmic only if each method identified them as  
662 rhythmic (i.e. BioDare did not ask to ignore them), their goodness of fit was below 1  
663 for FFT-NLLS and mFourfit or 0.9 for Spectrum Resampling and all estimates  
664 obtained by different methods were within 2.5h of each other. In Fig. 3, Figure 2 –  
665 supplement 1 and 2, the FFT-NLLS period estimates are shown. Period variability  
666 within and between cells was calculated as described previously (Kellogg & Tay,  
667 2015).

668

669 Since some of the sections imaged overlap (e.g. Figure 2f; Figure 3a; Figure 2-figure  
670 supplement 1c, 2c), in order to not count cells multiple times, some of the cells were  
671 removed. This was done in the following manner: if there was an area of overlap in  
672 multiple sections, only cells belonging to the sections with lower  $x$  and  $y$  positions  
673 were kept, e.g. in Figure 3a, any cells in the upper hypocotyl section that also belong

674 spatially to the lower hypocotyl section, were removed from subsequent analysis. In  
675 the repeat WT experiment the root tip section imaged encompasses a longer section of  
676 the root (Figure 2-figure supplement 1c). Hence, in order to make the analysis  
677 comparable to WT (Figure 3), we split the root tip section for further analysis. We  
678 considered the root tip cells of the repeat to be only those less than approximately  
679 0.66 mm from the actual tip, while the rest of them were classed as ‘Root up from tip’  
680 (Figure 2-figure supplement 1a, b).

681

682 In the case of analysis at tissue level, where multiple sections had to be pooled for  
683 analysis (e.g. Figure 1g, h and Figure 1-figure supplement 3, 4, 5), since different  
684 sections were imaged at different times, before any further statistics were done, all the  
685 data was interpolated at the times where measurements across any section were made.

686

687 For analysis of amplitudes, peak and trough times for the individual cells (Figure 2a,  
688 f, g, and Figure 2-figure supplement 1a, e, f; Figure 2-figure supplement 2a, e, f) were  
689 identified using the findpeaks function in MATLAB. This was done on linearly  
690 detrended data. In case of the WT data (Figure 2), since the data is sampled more  
691 frequently (every 1.1h vs. 3h in WT repeat and CCA1-long line), the data is noisier,  
692 hence a smoothing filter (robust local regression using weighted linear least squares  
693 and a 2<sup>nd</sup> degree polynomial model) was also applied after linear detrending.

694 Amplitudes of traces were calculated as a mean of all trough to peak and peak to  
695 trough amplitudes.

696

697 **Luciferase space-time analysis.** To facilitate analysis, individual seedlings were  
698 manually cropped into individual time stacks using ImageJ. From these image stacks

699 a rectangular region of interest (ROI) containing the full length of the root and as  
700 much length of the hypocotyl as possible, whilst still excluding the cotyledons, was  
701 defined. Custom developed MATLAB scripts were used to extract luminescence data  
702 for each pixel in the ROI, giving time series for each pixel. After inspection of the  
703 images and the time series, some features were identified and the following measures  
704 applied to address them:

705

- 706 I. Occasionally the cotyledon of the seedling or of a neighboring seedling  
707 protrudes into the ROI. At this stage the ROI was checked for pixels of  
708 overlapping seedlings and these regions were manually removed from the  
709 affected frames.  
710
- 711 II. Inside of the ROI the hypocotyl and root are surrounded by peripheral  
712 background pixels. The root and hypocotyl were segmented from the  
713 background using the mean of the grey levels as the threshold. The algorithm  
714 was applied to each image in the stack individually.  
715
- 716 III. Commonly supposed to be from solar cosmic rays, pixel spikes in intensity  
717 values occur sporadically in images. A 3-by-3 pixel median filter is applied to  
718 each image to remove these spikes.  
719
- 720 IV. The luminescence signal strength in a single seedling is weak and therefore  
721 the signal to noise ratio relatively low. A third order Butterworth filter was  
722 applied to pixel time series to remove high frequency noise. Time series were  
723 filtered using MATLAB's `filtfilt.m` function, which performs in the forward

724 and reverse direction to avoid phase distortion. A cut off frequency of 15% of  
725 the Nyquist frequency was identified as a best fit to our data.

726

727 V. In all experiments we observed dampening of the signal over time. Time series  
728 were therefore amplitude de-trended to better visualise spatial patterns. Time  
729 series were de-trended using the algorithms developed for the mFourfit toolkit  
730 (Edwards et al., 2010).

731

732 To visualise spatial patterns across the length of the root, space-time plots of the root  
733 luminescence were created (Fig. 3i, Figure 3-figure supplement 1). To do this we take  
734 the maximum signal intensity across one pixel wide longitudinal sections of the root  
735 for each image and assign this value to position  $m,n$  of the space time plot, where  $m$  is  
736 the image number and  $n$  the longitudinal section. The space-time plots presented  
737 include 10 pixels of the hypocotyl. The mean luminescence is normalised so that the  
738 peak expression of each longitudinal section ( $n$ ) is 1.

739

740 **Model simulation.** In Figure 1a we simulate an existing deterministic model of the  
741 clock (Pokhilko et al., 2012). The model was run for 168h from introduction into  
742 constant light conditions and *LHY/CCA1* mRNA is reported (in the model *CCA1* and  
743 *LHY* are treated as a single component (Pokhilko et al., 2012)).

744

745 In Figure 2, we simulated a stochastic model of an existing circadian clock model  
746 (Guerriero et al., 2012; Pokhilko et al., 2012). In Guerriero et al, the model is scaled  
747 by the parameter  $\Omega$ , so that a molecule count close to  $\Omega$  is obtained. For detailed  
748 description of the scaling, the reader can refer to this paper. Comparison of the model

749 simulated for different  $\Omega$  values to the previously published data indicates that the  
750 model molecule count of a few hundred cells (i.e.  $\Omega$ ) is a good prediction of the actual  
751 molecule count (Guerriero et al., 2012). Here we have taken the same circadian clock  
752 model and simulated it for various values of  $\Omega$ . Model equations scaled for the  $\Omega$   
753 factor are given in (Guerriero et al., 2012). The model was simulated for 200h from  
754 introduction into constant light conditions and 100 simulation runs (proxy for 100  
755 cells) were performed. The stochastic simulations were performed using the Gillespie  
756 algorithm (Gillespie, 1977). For each simulation, further analysis of amplitudes and  
757 period was done after the simulated data was interpolated at 2h intervals and then  
758 only for the simulated data from 28h to 168h in LL, in order to be closely comparable  
759 to the time interval of the original single cell data (Figure 1d). The Gillespie  
760 algorithm was written in MATLAB and the amplitudes and periods of the simulations  
761 were extracted using the MATLAB findpeaks function. Periods were calculated as a  
762 mean difference of peak-to-peak intervals. Amplitudes were calculated as a mean of  
763 all trough to peak and peak to trough amplitudes.

764

### 765 **Synchronisation analysis.**

766 For a set of individual cells, the inter-cellular synchrony was analysed. First, one cell  
767 was selected as a centroid of the synchronization analysis. Then, its neighboring cells,  
768 defined as those located within its sphere (radius  $r$ ), were extracted. From CCA1-YFP  
769 expression signal, phase of the  $j$ -th neighboring cell ( $j=1,2,..,N$ ) was computed as  
770 (Pikovsky *et al.*, 2003)

$$\theta_j(t) = 2\pi k + \frac{t-t_k}{t_{k+1}-t_k} \times 2\pi.$$

771 Here, the  $k$ -th peak time  $t_k$  of the bioluminescence signal was detected by a cosine  
772 fitting method (coefficient of determination larger than 0.7) using the estimated

773 period  $\tau_i$ . Then for each time point, the order parameter  $R(t)$  (Kuramoto, 1984) was  
774 obtained as

$$R(t) e^{\Theta} = \frac{1}{N} \sum_{j=1}^N e^{-i\theta_j(t)}$$

775 The order parameter ( $0 < R < 1$ ) becomes unity for completely synchronized cells  
776 ( $\theta_1 = \theta_2 = \dots = \theta_N$ ), whereas it becomes zero for non-synchronised cells. Figure 3-figure  
777 supplement 2 shows the results of synchronization analysis for root tip (**a**), lower root  
778 (**b**), upper root (**c**), lower hypocotyl (**d**), upper hypocotyl (**e**), and cotyledon (**f**). For  
779 each section, a total of  $n$  curves were drawn by selecting individual cells as the  
780 centroids (root tip,  $n = 242$ ; lower root,  $n = 83$ ; upper root,  $n = 46$ ; lower hypocotyl,  $n$   
781  $= 114$ ; upper hypocotyl,  $n = 53$ ; cotyledon,  $n = 103$ ). By linear regression analysis of  
782 each curve, the slope of the order parameter against time was computed, where a  
783 positive slope implies that the level of synchrony increases in time due to cell-to-cell  
784 interactions. Figure 3-figure supplement 2h shows the dependence of the slope value  
785 on cell density ( $\rho = N/(4/3)\pi r^3$ ). Positive slopes are mostly found in the root tip (Figure  
786 3-figure supplement 2g), with a high correlation to the cell density.

787

788 Next, the coupling strength was estimated for each synchronization curve  $\{ R(t) \}$ .

789 Our approach is based upon a simplified version of the technique developed for  
790 weakly interacting mammalian circadian cells (Rougemont & Naef, 2007). As a  
791 model for the neighboring cells, we consider a set of coupled phase oscillators

$$\frac{d\theta_j}{dt} = \omega_j + \frac{K}{N} \sum_{k=1}^N \sin(\theta_k - \theta_j)$$

792 Assuming that the period  $\tau_j$  estimated from the  $j$ -th cellular trace is not strongly  
793 affected by the other cells (Rougemont & Naef, 2007), the natural angular frequency  
794 was set as  $\omega_j = 2\pi/\tau_j$  for each oscillator. Given an initial condition  $\theta_j(0)$  extracted from



795 the cellular traces, the phase oscillator model was simulated (Euler method with time  
796 step 0.1 h). Accordingly, the time evolution of the order parameter  $R(t)$  could be  
797 obtained. The coupling strength, which was initially set as  $K=0.002$ , is constant for  
798 each simulation. Starting from the minimum level of coupling, the coupling strength  
799 was slowly increased so that the phase oscillators are eventually mutually  
800 synchronized and the corresponding slope value increases monotonously. At the point  
801 when the slope value exceeds the one obtained from the experiment, the  
802 corresponding value of  $K$  provides the coupling estimate for the experimental data.  
803 Figure 3-figure supplement 2i shows the results. Stronger coupling was estimated for  
804 densely populated areas, implying that the cell-to-cell interactions are strengthened  
805 when cells are closely located to each other.

806

807 To examine the dependence of the present analysis on the synchrony measure used,  
808 the synchronization index (Garcia-Ojalvo, Elowitz, Strogatz, 2004) was utilized in  
809 place of the order parameter. The synchronization index has the advantage that the  
810 noise-sensitive procedure of phase extraction from the cellular traces is not required,  
811 since it can be computed directly from the measured signals. For  $N$  cellular traces  $\{$   
812  $x_j(t) : j=1,2,\dots,N \}$ , the averaged signal  $M(t) = (1/N) \sum_j x_j(t)$  is computed. Then the  
813 synchronization index is given by

$$R = \frac{\langle M^2 \rangle - \langle M \rangle^2}{(1/N) \sum_j \{ \langle x_j^2 \rangle - \langle x_j \rangle^2 \}}$$

814 where  $\langle \rangle$  denotes time average. In a synchronized cellular state, the averaged signal  
815 gives rise to a pronounced amplitude, resulting in  $R=1$ . The fully desynchronized  
816 cellular state, on the other hand, results in  $R=0$ . To see the time evolution of the level  
817 of synchrony, the synchronization index  $R(t)$  at time  $t$  was computed for windowed

818 time traces of  $\{ x_j(s) : t-12 < s < t+12 \}$  (window: 24h). Figure 3-figure supplement 3  
819 shows the analysis results based on the synchronization index. The panels are ordered  
820 in correspondence with those of Figure 3-figure supplement 2. Positive slopes are  
821 again found in the root tip, implying that the level of synchrony increases in time due  
822 to cell-cell interactions. The results are therefore consistent with the ones obtained by  
823 the order parameter.

824

825 To examine the dependence of the synchronization analysis on the particular  
826 experimental data set used, the order parameters were computed for the CCA1-long  
827 line. As shown in Figure 3-figure supplement 4, the slope of the order parameter for  
828 the CCA1-long line experiment is again well correlated with the cell density, where  
829 highly dense cells are located in the root tip. Although the time resolution was three  
830 times lower in this experiment, the same tendency was observed. The WT repeat  
831 experiment (Figure 2-figure supplement 1) was not analysed, as the timeseries was  
832 too short and time resolution was too low to enable accurate synchronization analysis.

833

834 **Phase oscillator model.** We constructed a model where we describe the dynamics of  
835 the CCA1::CCA1-YFP in each cell by a simple Kuramoto phase oscillator. For every  
836 cell at a position  $(m,n)$  in the plant (when viewed in 2D with  $m$  denoting position in  
837 the horizontal direction and  $n$  denoting position in the vertical direction) the phase of  
838 the oscillator  $\theta^{(m,n)}$  changes in time ( $t$ ) so that

839 
$$\frac{d\theta^{(m,n)}}{dt} = \omega^{(m,n)} + K \sum_{\langle p,q \rangle} \sin(\theta^{(p,q)} - \theta^{(m,n)}).$$

840 Here  $\omega^{(m,n)}$  describes the intrinsic frequency of the oscillator and the second term  
841 describes the oscillator's dependence on the coupling to the nearest neighbours (i.e.  
842 cells in positions  $(p,q)$  where  $p=m-1, \dots, m+1$  and  $q=n-1, \dots, n+1$ ) with  $K$  as the coupling

843 constant. The bioluminescence of each cell is then taken to be

844  $B^{(m,n)}(t) = \cos(\theta^{(m,n)}(t)) + 1$ . Cells in the plant conform to a template that is

845 taken to be a symmetric shape, and resembles the shape of a seedling. The total

846 bioluminescence across each vertical section ( $n$ ) of the plant is taken to be the sum of

847 the bioluminescence of all cells along that section i.e.,  $B_{tot}^n(t) = \sum_{m=1}^{Nw} B^{(m,n)}(t)$

848 where the width of the plant counts  $Nw$  number of cells. The space-time plot shown in

849 Figure 3k shows the total luminescence normalized so that the peak expression of

850 each vertical section is 1.

851

852 In the model we assume that the cells in the three sections (the cotyledon/hypocotyl,

853 the root and the root tip) have different intrinsic periods, with the cells in the

854 cotyledon and hypocotyl having period of 24h, those in the root having the period of

855 around 25.55h and the ones in the root tip a period of 22.67h. These overall match the

856 qualitative period differences seen across the different plant sections. In all

857 simulations the coupling constant  $K$  is arbitrarily set to 1. The ODEs are solved using

858 the Euler method.
